# Supplementary material
Source: PubMed Central journal article supplement (PMC11027879)
Supplement: 262_2019_2431_MOESM1_ESM.pdf [file 262_2019_2431_MOESM1_ESM.pdf]

Electronic Supplementary Table 1. Characteristics, CT findings, and treatment of patients with preexisting ILD who developed pneumonitis  
 ILD, interstitial lung disease.

| Age | Onset time (month) | Grade | Radiographic pattern |             | Treatment for pneumonitis | Details of follow-up      |
|-----|--------------------|-------|----------------------|-------------|---------------------------|---------------------------|
|     |                    |       | Preexisting ILD      | Pneumonitis |                           |                           |
| 83  | 0.7                | 3     | UIP                  | COP         | IV methylprednisolone     | Next systemic therapy     |
| 77  | 2.1                | 2     | UIP                  | NSIP        | Oral prednisone           | Follow-up without therapy |
| 66  | 1.3                | 5     | Possible UIP         | DAD         | IV methylprednisolone     | Died due to pneumonitis   |
| 60  | 1.9                | 2     | Possible UIP         | DAD         | Oral dexamethasone        | Hospice care              |
| 54  | 0.3                | 2     | UIP                  | HP          | IV dexamethasone          | Hospice care              |

Electronic Supplementary Table 2. Characteristics, CT findings, and treatment of patients without preexisting ILD who developed pneumonitis

ILD, interstitial lung disease

| Age | Onset time (months) | Grade | Radiographic pattern | Treatment for pneumonitis       | Detail of follow-up       |
|-----|---------------------|-------|----------------------|---------------------------------|---------------------------|
| 76  | 0.7                 | 5     | HP                   | IV dexamethasone                | Died due to pneumonitis   |
| 62  | 4.0                 | 3     | COP                  | IV methylprednisolone           | Hospice care              |
| 57  | 1.2                 | 3     | HP                   | IV methylprednisolone           | Hospice care              |
| 62  | 0.8                 | 2     | COP                  | None                            | Hospice care              |
| 82  | 7.3                 | 2     | COP                  | Oral prednisone                 | Hospice care              |
| 46  | 0.3                 | 3     | HP                   | IV prednisone                   | Next systemic therapy     |
| 79  | 11.8                | 1     | NSIP                 | None                            | Follow-up without therapy |
| 64  | 1.8                 | 3     | COP                  | IV methylprednisolone           | Hospice care              |
| 64  | 0.3                 | 5     | COP                  | None                            | Died due to pneumonitis   |
| 58  | 3.0                 | 3     | COP                  | Oral prednisone                 | Hospice care              |
| 69  | 4.7                 | 5     | HP                   | None                            | Died due to pneumonitis   |
| 45  | 2.5                 | 2     | HP                   | Oral prednisone                 | Next systemic therapy     |
| 65  | 14.6                | 2     | COP                  | Oral prednisone                 | Hospice care              |
| 67  | 7.4                 | 2     | COP                  | Oral prednisone                 | Follow-up without therapy |
| 72  | 1.0                 | 2     | DAD                  | Oral prednisone                 | Next systemic therapy     |
| 62  | 2.3                 | 2     | COP                  | Oral prednisone                 | Hospice care              |
| 69  | 0.8                 | 2     | COP                  | None                            | Restarted nivolumab       |
| 65  | 1.4                 | 2     | HP                   | Oral prednisone                 | Next systemic therapy     |
| 68  | 4.2                 | 2     | COP                  | Oral prednisone                 | Next systemic therapy     |
| 68  | 1.6                 | 2     | COP                  | Oral prednisone                 | Next systemic therapy     |
| 37  | 6.5                 | 2     | COP                  | Oral prednisone                 | Next systemic therapy     |
| 69  | 0.2                 | 5     | DAD                  | Oral prednisone                 | Died due to pneumonitis   |
| 43  | 6.5                 | 3     | HP                   | Oral prednisone                 | Next systemic therapy     |
| 63  | 8.2                 | 3     | HP                   | Oral prednisone                 | Next systemic therapy     |
| 48  | 0.7                 | 2     | COP                  | Oral prednisone                 | Hospice care              |
| 58  | 1.0                 | 1     | COP                  | None                            | Restarted nivolumab       |
| 51  | 1.0                 | 5     | DAD                  | IV prednisone and IV infliximab | Died due to pneumonitis   |
| 44  | 3.5                 | 2     | COP                  | Oral dexamethasone              | Next systemic therapy     |
| 61  | 1.4                 | 1     | COP                  | None                            | Follow-up without therapy |
| 47  | 4.1                 | 2     | COP                  | Oral prednisone                 | Follow-up without therapy |
| 50  | 2.6                 | 2     | COP                  | Oral prednisone                 | Hospice care              |
